# Supplementary material
Source: PubMed Central journal article supplement (PMC6864752)
Supplement: Supp_Data.pdf [file Supp_Data.pdf]

## Calculations of 24-Hour Respiratory Quotient and Energy Expenditure from Gas Exchanges Measurements in a Whole-Room Indirect Calorimeter

The ratio between the average CO<sub>2</sub> production (VCO<sub>2</sub>) and the average O<sub>2</sub> consumption (VO<sub>2</sub>) calculated over 24 hours is defined as the respiratory quotient (RQ):

$$RQ = VCO_2/VO_2.$$

The energy production rate (energy expenditure or EE) is calculated based on VO<sub>2</sub> and RQ values using Lusk's equation as follows:

$$EE = VO_2 \times [4.686 + (RQ - 0.707) \times 0.361/0.293],$$

where 4.686 is the caloric equivalent of 1 L of O<sub>2</sub> when the RQ is 0.707; 0.707 is the RQ when fat is oxidized; 0.293 is the difference between the RQ for carbohydrate oxidation and fat oxidation; 0.361 is the difference in the caloric equivalent of 1 L O<sub>2</sub> between an RQ=1.000 and an RQ=0.707 (=5.047-4.686 kcal/L O<sub>2</sub>).

### Examples of Food Items During Each Dietary Intervention

ENERGY BALANCE Diet (2000 kcal)

| <i>Item name</i>                          | <i>Quantity</i> | <i>Measure</i> | <i>Calories (kcal)</i> | <i>Protein (g)</i> | <i>Carbohydrate (g)</i> | <i>Fat (g)</i> | <i>Weight (g)</i> |
|-------------------------------------------|-----------------|----------------|------------------------|--------------------|-------------------------|----------------|-------------------|
| Breakfast                                 |                 |                | 390.4                  | 21.35              | 39.54                   | 16.25          | 259               |
| Borden's Lite-Line cheese                 | 15              | Gram           | 27.32                  | 3.11               | 0.8                     | 1.55           | 15                |
| Egg, egg, large, raw                      | 100             | Gram           | 158                    | 12.2               | 1.2                     | 11.2           | 100               |
| Tortilla, flour, soft taco, mission foods | 50              | Gram           | 157.78                 | 5.28               | 26.28                   | 3.5            | 50                |
| Orange juice, 3/1 concentration           | 85              | Gram           | 38.3                   | 0.56               | 9.15                    | 0              | 85                |
| Hot sauce, jalapeno, packet               | 1               | Each           | 9                      | 0.2                | 2.1                     | 0              | 9                 |
| Lunch                                     |                 |                | 605.69                 | 29.65              | 79.12                   | 18.46          | 348               |
| Beef                                      | 95              | Gram           | 132.05                 | 20.9               | 0                       | 4.66           | 95                |
| Rice, white, long-grain, parboiled, dry   | 50              | Gram           | 185.5                  | 3.4                | 40.85                   | 0.3            | 50                |
| Butter, butter, salted, solid             | 11              | Gram           | 78.87                  | 0.1                | 0.01                    | 8.92           | 11                |
| Bread, white, soft, enrich, slice         | 25              | Gram           | 67                     | 2.1                | 12.6                    | 0.8            | 25                |
| Ban, banana, peeled, fresh                | 40              | Gram           | 37.27                  | 0.45               | 9.36                    | 0.18           | 40                |
| Orange juice, 3/1 concentration           | 0               | Gram           | 0                      | 0                  | 0                       | 0              | 0                 |
| ld cook, Lorna Doone, cookie              | 14              | Gram           | 70                     | 1                  | 8.8                     | 3.4            | 14                |
| Green beans                               | 104             | Gram           | 26                     | 1.5                | 5.4                     | 0.2            | 104               |
| Hot sauce, jalapeno, packet               | 1               | Each           | 9                      | 0.2                | 2.1                     | 0              | 9                 |
| Dinner                                    |                 |                | 605.69                 | 29.65              | 79.12                   | 18.46          | 348               |
| Beef                                      | 95              | Gram           | 132.05                 | 20.9               | 0                       | 4.66           | 95                |
| Rice, white, long-grain, parboiled        | 50              | Gram           | 185.5                  | 3.4                | 40.85                   | 0.3            | 50                |
| Butter, butter, salted                    | 11              | Gram           | 78.87                  | 0.1                | 0.01                    | 8.92           | 11                |
| Bread, white, soft, enrich, slice         | 25              | Gram           | 67                     | 2.1                | 12.6                    | 0.8            | 25                |
| Ban, banana, peeled                       | 40              | Gram           | 37.27                  | 0.45               | 9.36                    | 0.18           | 40                |
| Orange juice, 3/1 concentration           | 0               | Gram           | 0                      | 0                  | 0                       | 0              | 0                 |
| ld cook, Lorna Doone, cookie              | 14              | Gram           | 70                     | 1                  | 8.8                     | 3.4            | 14                |
| Green beans                               | 104             | Gram           | 26                     | 1.5                | 5.4                     | 0.2            | 104               |
| Hot sauce, jalapeno, packet               | 1               | Each           | 9                      | 0.2                | 2.1                     | 0              | 9                 |
| Evening snack                             |                 |                | 407.33                 | 19.63              | 53.31                   | 13.28          | 375               |
| Turkey, breast meat, white                | 60              | Gram           | 66                     | 13.44              | 0                       | 0.84           | 60                |
| Bread, white, soft, enrich, slice         | 50              | Gram           | 134                    | 4.2                | 25.2                    | 1.6            | 50                |
| Butter, butter, salted, solid             | 13              | Gram           | 93.21                  | 0.12               | 0.01                    | 10.54          | 13                |
| Peach, peaches                            | 150             | Gram           | 66.32                  | 0.95               | 17.37                   | —              | 150               |
| Orange juice                              | 95              | Gram           | 42.8                   | 0.63               | 10.23                   | 0              | 95                |
| Mustard, packet                           | 1               | Each           | 5                      | 0.3                | 0.5                     | 0.3            | 7                 |

ld cook, cook.

## STANDARD OVERFEEDING Diet (4000 kcal)

| <i>Item name</i>                          | <i>Quantity</i> | <i>Measure</i> | <i>Calories (kcal)</i> | <i>Protein (g)</i> | <i>Carbohydrate (g)</i> | <i>Fat (g)</i> | <i>Weight (g)</i> |
|-------------------------------------------|-----------------|----------------|------------------------|--------------------|-------------------------|----------------|-------------------|
|                                           |                 |                | 4001.22                | 221.37             | 463.97                  | 138.27         | 2811              |
| Breakfast                                 |                 |                | 990.67                 | 51.44              | 112.07                  | 37.56          | 638               |
| 1c ch, Borden's Lite-Line cheese          | 45              | Gram           | 81.96                  | 9.32               | 2.41                    | 4.66           | 45                |
| Egg, egg, large, raw                      | 200             | Gram           | 316                    | 24.4               | 2.4                     | 22.4           | 200               |
| Tortilla, flour, soft taco, mission foods | 150             | Gram           | 473.33                 | 15.83              | 78.83                   | 10.5           | 150               |
| Orange juice, 3/1 concentration           | 225             | Gram           | 101.37                 | 1.48               | 24.23                   | 0              | 225               |
| Hot sauce, jalapeno, packet               | 2               | Each           | 18                     | 0.4                | 4.2                     | 0              | 18                |
| Lunch                                     |                 |                | 1098.82                | 56.96              | 132.33                  | 37.33          | 752               |
| Beef                                      | 190             | Gram           | 264.1                  | 41.8               | 0                       | 9.31           | 190               |
| Rice, white, long-grain, parboiled, dry   | 65              | Gram           | 241.15                 | 4.42               | 53.11                   | 0.39           | 65                |
| Butter, butter, salted, solid             | 25              | Gram           | 179.25                 | 0.23               | 0.03                    | 20.27          | 25                |
| Bread, white, soft, enrich, slice         | 50              | Gram           | 134                    | 4.2                | 25.2                    | 1.6            | 50                |
| Ban, banana, peeled, fresh                | 55              | Gram           | 51.25                  | 0.63               | 12.88                   | 0.25           | 55                |
| Orange juice, 3/1 concentration           | 120             | Gram           | 54.07                  | 0.79               | 12.92                   | 0              | 120               |
| ld cook, Lorna Doone, cookie              | 21              | Gram           | 105                    | 1.5                | 13.2                    | 5.1            | 21                |
| Green beans                               | 208             | Gram           | 52                     | 3                  | 10.8                    | 0.4            | 208               |
| Hot sauce, jalapeno, packet               | 2               | Each           | 18                     | 0.4                | 4.2                     | 0              | 18                |
| Dinner                                    |                 |                | 1089.82                | 56.76              | 130.23                  | 37.33          | 743               |
| Beef                                      | 190             | Gram           | 264.1                  | 41.8               | 0                       | 9.31           | 190               |
| Rice, white, long-grain, parboiled, dry   | 65              | Gram           | 241.15                 | 4.42               | 53.11                   | 0.39           | 65                |
| Butter, butter, salted, solid             | 25              | Gram           | 179.25                 | 0.23               | 0.03                    | 20.27          | 25                |
| Bread, white, soft, enrich, slice         | 50              | Gram           | 134                    | 4.2                | 25.2                    | 1.6            | 50                |
| Ban, banana, peeled, fresh                | 55              | Gram           | 51.25                  | 0.63               | 12.88                   | 0.25           | 55                |
| Orange juice, 3/1 concentration           | 120             | Gram           | 54.07                  | 0.79               | 12.92                   | 0              | 120               |
| Cook, Lorna Doone, cookie                 | 21              | Gram           | 105                    | 1.5                | 13.2                    | 5.1            | 21                |
| Green beans                               | 208             | Gram           | 52                     | 3                  | 10.8                    | 0.4            | 208               |
| Hot sauce, jalapeno, packet               | 1               | Each           | 9                      | 0.2                | 2.1                     | 0              | 9                 |
| Evening snack                             |                 |                | 821.92                 | 56.21              | 89.33                   | 26.06          | 678               |
| Turkey, breast meat, white                | 200             | Gram           | 220                    | 44.8               | 0                       | 2.8            | 200               |
| Bread, white, soft, enrich, slice         | 100             | Gram           | 268                    | 8.4                | 50.4                    | 3.2            | 100               |
| Butter, butter, salted, solid             | 24              | Gram           | 172.08                 | 0.22               | 0.02                    | 19.46          | 24                |
| Peach, peaches                            | 160             | Gram           | 70.74                  | 1.01               | 18.53                   | —              | 160               |
| Orange juice, 3/1 concentration           | 180             | Gram           | 81.1                   | 1.19               | 19.38                   | 0              | 180               |
| Mustard                                   | 2               | Each           | 10                     | 0.6                | 1                       | 0.6            | 14                |
| % recommendation                          |                 |                | 1152.49                | 3328.93            | 971.92                  | 1280.19        |                   |

1c ch, cheese.

## HIGH-CARBOHYDRATE NORMAL-PROTEIN Overfeeding Diet (4000 kcal)

| <i>Item name</i>                                | <i>Quantity</i> | <i>Measure</i> | <i>Calories (kcal)</i> | <i>Protein (g)</i> | <i>Carbohydrate (g)</i> | <i>Fat (g)</i> | <i>Weight (g)</i> |
|-------------------------------------------------|-----------------|----------------|------------------------|--------------------|-------------------------|----------------|-------------------|
|                                                 |                 |                | 4001.84                | 193.16             | 748.89                  | 33.31          | 4658              |
| Breakfast                                       |                 |                | 1093.42                | 73.7               | 169.52                  | 11.13          | 1214              |
| Ham, honey, 97% fat free, Hillshire Deli Select | 210             | Gram           | 262.5                  | 33.75              | 11.25                   | 5.63           | 210               |
| Egg substitute                                  | 300             | Gram           | 147.54                 | 29.51              | 4.92                    | 0              | 300               |
| Pancakes original                               | 4               | Serving        | 306.34                 | 8.34               | 58.03                   | 4.61           | 132               |
| Syrup, pancake, packet                          | 2               | Each           | 131.04                 | 0                  | 34.42                   | 0              | 56                |
| Pineapple juice                                 |                 | Serving        | 123                    | 0.6                | 29.7                    | 0.3            | 216               |
| Fruit                                           | 3               | Serving        | 123                    | 1.5                | 31.2                    | 0.6            | 300               |
| Lunch                                           |                 |                | 881.63                 | 34.45              | 184.76                  | 5.01           | 1038              |
| Cottage cheese, nonfat                          | 200             | Gram           | 131.15                 | 21.31              | 11.48                   | 0              | 200               |
| Bagel, plain, Sara Lee                          | 95              | Gram           | 250                    | 9                  | 51                      | 1              | 95                |
| Jelly, 0.5 oz packet                            | 28              | Gram           | 74.48                  | 0.04               | 19.59                   | 0.01           | 28                |
| "a" salad, garden salad and drsp pkg            | 1               | Serving        | 30                     | 0.8                | 6.1                     | 0.4            | 100               |
| Fruit roll ups, variety, betty cracker          | 3               | Each           | 150                    | 0                  | 36                      | 3              | 42                |
| Fruit                                           | 3               | Serving        | 123                    | 1.5                | 31.2                    | 0.6            | 300               |

| <i>Item name</i>                                                | <i>Quantity</i> | <i>Measure</i> | <i>Calories (kcal)</i> | <i>Protein (g)</i> | <i>Carbohydrate (g)</i> | <i>Fat (g)</i> | <i>Weight (g)</i> |
|-----------------------------------------------------------------|-----------------|----------------|------------------------|--------------------|-------------------------|----------------|-------------------|
| Orange juice, 3/1 concentration                                 | 3               | Serving        | 123                    | 1.8                | 29.4                    | 0              | 273               |
| Dinner                                                          |                 |                | 1205.91                | 32.81              | 249.76                  | 12.72          | 1479              |
| b&b stew                                                        | 1               | Serving        | 240                    | 18.5               | 36.1                    | 2.7            | 100               |
| Tortilla, flour, soft taco, mission foods                       | 82              | Gram           | 235.34                 | 7.13               | 40.67                   | 4.92           | 82                |
| Green beans with pimento                                        | 2               | Serving        | 60                     | 3.2                | 12.4                    | 0.6            | 228               |
| Fruit                                                           | 3               | Serving        | 123                    | 1.5                | 31.2                    | 0.6            | 300               |
| Apple juice                                                     | 3               | Serving        | 120                    | 0.3                | 29.7                    | 0.3            | 255               |
| Hot sauce, jalapeno, packet                                     | 1               | Each           | 9                      | 0.2                | 2.1                     | 0              | 9                 |
| Sherbet, orange                                                 | 180             | Gram           | 259.2                  | 1.98               | 54.72                   | 3.6            | 180               |
| Soda, root beer                                                 | 325             | Gram           | 159.37                 | 0                  | 42.86                   | 0              | 325               |
| Evening snack                                                   |                 |                | 820.88                 | 52.19              | 144.85                  | 4.45           | 927               |
| Bagel, plain                                                    | 95              | Gram           | 250                    | 9                  | 51                      | 1              | 95                |
| Turkey, breast meat, white                                      | 120             | Gram           | 132                    | 26.88              | 0                       | 1.68           | 120               |
| Cheese product, American, pasteurized processed, sliced, nonfat | 56              | Gram           | 82.88                  | 12.71              | 6.55                    | 0.56           | 56                |
| Fruit                                                           | 3               | Serving        | 123                    | 1.5                | 31.2                    | 0.6            | 300               |
| Grapefruit juice                                                | 3               | Serving        | 123                    | 1.8                | 29.4                    | 0.3            | 321               |
| Mustard, packet                                                 | 1               | Each           | 5                      | 0.3                | 0.5                     | 0.3            | 7                 |
| Jellybeans                                                      | 28              | Gram           | 105                    | 0                  | 26.19                   | 0.01           | 28                |
| % recommendation                                                |                 |                | 119.2                  | 6403.72            | 162.23                  | 31.89          |                   |

drsp pkg, dressing package; b&b stew, beef and bean stew.

#### HIGH-FAT NORMAL-PROTEIN Overfeeding Diet (4000 kcal)

| <i>Item name</i>                        | <i>Quantity</i> | <i>Measure</i> | <i>Calories (kcal)</i> | <i>Protein (g)</i> | <i>Carbohydrate (g)</i> | <i>Fat (g)</i> | <i>Weight (g)</i> |
|-----------------------------------------|-----------------|----------------|------------------------|--------------------|-------------------------|----------------|-------------------|
| Breakfast                               |                 |                | 4003.16                | 205.3              | 203.97                  | 274.6          | 2174              |
| Milk, whole, 3.25%, with vitamin D      | 224             | Gram           | 828.52                 | 39.06              | 42.47                   | 56.47          | 589               |
| Eggs, hard boiled, lrg, ea              | 4               | Each           | 316                    | 24.4               | 2.4                     | 22.4           | 200               |
| Bac, bacon, cooked, crisp               | 4               | Serving        | 116                    | 6                  | 0.04                    | 10             | 20                |
| Ban, banana, peeled, fresh              | 125             | Gram           | 116.48                 | 1.42               | 29.26                   | 0.57           | 125               |
| Butter, butter, salted, solid           | 20              | Gram           | 143.4                  | 0.18               | 0.02                    | 16.22          | 20                |
| Lunch                                   |                 |                | 871.3                  | 46.21              | 71.8                    | 57.21          | 611               |
| Lunchmeat, ham, honey                   | 235             | Gram           | 330.99                 | 39.72              | 16.55                   | 23.17          | 235               |
| Bread, white, soft, enrich, slice       | 2               | Each           | 140                    | 4                  | 28                      | 2              | 56                |
| Mayonnaise, regular, Kraft              | 40              | Gram           | 285.71                 | 0                  | 0                       | 31.43          | 40                |
| "a" salad, garden salad and drsp pkg    | 1               | Serving        | 30                     | 0.8                | 6.1                     | 0.4            | 100               |
| Oranges, fresh, medium, 2 5/8" diameter | 180             | Gram           | 84.6                   | 1.69               | 21.15                   | 0.22           | 180               |
| Dinner                                  |                 |                | 1391.78                | 67.34              | 62.77                   | 95.49          | 564               |
| Beef patty, broiled, 20% fat            | 228             | Gram           | 615.6                  | 58.71              | 0                       | 40.54          | 228               |
| Bun, hamburger bun, 1/2 serving         | 2               | Serving        | 166                    | 4.6                | 29.6                    | 3.2            | 56                |
| Carrot, carrots, frozen, vegetable      | 110             | Gram           | 42.17                  | 1.28               | 9.9                     | 0.18           | 110               |
| Potato, baked, medium                   | 110             | Gram           | 102.3                  | 2.75               | 23.27                   | 0.14           | 110               |
| Mayonnaise, regular, Kraft              | 40              | Gram           | 285.71                 | 0                  | 0                       | 31.43          | 40                |
| Oil, olive, extra virgin                | 20              | Gram           | 180                    | 0                  | 0                       | 20             | 20                |
| Evening snack                           |                 |                | 911.56                 | 52.69              | 26.93                   | 65.42          | 410               |
| Turkey, breast meat                     | 175             | Gram           | 192.5                  | 39.2               | 0                       | 2.45           | 175               |
| Cheese, cheddar                         | 56              | Gram           | 220                    | 12                 | 1                       | 18             | 56                |
| Crackers, fresh stacks                  | 14              | Gram           | 72.92                  | 0.88               | 8.46                    | 4.08           | 14                |
| Apples, fresh, medium                   | 115             | Gram           | 67.65                  | 0.17               | 17.42                   | 0.34           | 115               |
| Butter, butter, salted                  | 50              | Gram           | 358.5                  | 0.45               | 0.05                    | 40.55          | 50                |
| % recommendation                        |                 |                | 149.51                 | 404.12             | 55.4                    | 329.65         |                   |

lrg, large; ea, each.

## HIGH-PROTEIN HIGH-FAT Overfeeding Diet (4000 kcal)

| <i>Item name</i>                              | <i>Quantity</i> | <i>Measure</i> | <i>Calories (kcal)</i> | <i>Protein (g)</i> | <i>Carbohydrate (g)</i> | <i>Fat (g)</i> | <i>Weight (g)</i> |
|-----------------------------------------------|-----------------|----------------|------------------------|--------------------|-------------------------|----------------|-------------------|
|                                               |                 |                | 4020.67                | 301.61             | 256.15                  | 194.48         | 2698.89           |
| Breakfast                                     |                 |                | 782.36                 | 70.59              | 49.94                   | 32.25          | 884               |
| Bac, bacon, cooked, crisp                     | 6               | Serving        | 174                    | 9                  | 0.06                    | 15             | 30                |
| Egg substitute, scramblers, MorningStar Farms | 250             | Gram           | 171.5                  | 28.73              | 9.88                    | 1.9            | 250               |
| Cottage cheese, large curd, 4%                | 220             | Gram           | 223.73                 | 20.51              | 11.19                   | 9.32           | 220               |
| Fruit                                         | 1               | Serving        | 41                     | 0.5                | 10.4                    | 0.2            | 100               |
| Milk, 2%                                      | 275             | Gram           | 163.14                 | 11.65              | 16.31                   | 5.83           | 275               |
| Hot sauce, jalapeno, packet                   | 1               | Each           | 9                      | 0.2                | 2.1                     | 0              | 9                 |
| Lunch                                         |                 |                | 1016                   | 45.1               | 46.1                    | 71.5           | 397               |
| Beef                                          | 2               | Serving        | 350                    | 12.4               | 0                       | 32.8           | 112               |
| Cheese Enchilada                              | 1               | Serving        | 590                    | 30.8               | 28.7                    | 38.4           | 100               |
| Green beans                                   | 1               | Serving        | 26                     | 1.5                | 5.4                     | 0.2            | 104               |
| Pineapple juice                               | 1               | Serving        | 41                     | 0.2                | 9.9                     | 0.1            | 72                |
| Hot sauce, jalapeno, packet                   | 1               | Each           | 9                      | 0.2                | 2.1                     | 0              | 9                 |
| Dinner                                        |                 |                | 1067.6                 | 110.02             | 102.45                  | 23.33          | 630.89            |
| Chili con carne                               | 1               | Serving        | 466                    | 51.9               | 40.3                    | 10.4           | 100               |
| Beef                                          | 140             | Gram           | 194.6                  | 30.8               | 0                       | 6.86           | 140               |
| Pinto beans                                   | 75              | Gram           | 95                     | 5.63               | 17.75                   | 0.38           | 75                |
| “a” salad, garden salad and drsp              | 1               | Serving        | 30                     | 0.8                | 6.1                     | 0.4            | 100               |
| Pure protein bar, chewy chocolate chip        | 1               | Each           | 200                    | 20                 | 18                      | 5              | 49.89             |
| Fruit                                         | 1               | Serving        | 41                     | 0.5                | 10.4                    | 0.2            | 100               |
| Grape juice                                   | 1               | Serving        | 41                     | 0.4                | 9.9                     | 0.1            | 66                |
| Evening snack                                 |                 |                | 1154.71                | 75.9               | 57.66                   | 67.39          | 787               |
| Ham, turkey ham                               | 140             | Gram           | 179.2                  | 26.32              | 0.56                    | 7.14           | 140               |
| Cheese, cheddar                               | 60              | Gram           | 235.71                 | 12.86              | 1.07                    | 19.29          | 60                |
| Bread, white, soft, enrich, slice             | 2               | Each           | 140                    | 4                  | 28                      | 2              | 56                |
| Cottage cheese, large curd, 4%                | 220             | Gram           | 223.73                 | 20.51              | 11.19                   | 9.32           | 220               |
| Milk, 2%                                      | 275             | Gram           | 163.14                 | 11.65              | 16.31                   | 5.83           | 275               |
| Mustard, packet                               | 1               | Serving        | 5                      | 0.3                | 0.5                     | 0.3            | 7                 |
| Butter, butter, salted                        | 29              | Gram           | 207.93                 | 0.26               | 0.03                    | 23.52          | 29                |
| % recommendation                              |                 |                | 119.76                 | 9999.04            | 55.49                   | 186.2          |                   |

## LOW-PROTEIN HIGH-FAT Overfeeding Diet (4000 kcal)

| <i>Item name</i>                          | <i>Quantity</i> | <i>Measure</i> | <i>Calories (kcal)</i> | <i>Protein (g)</i> | <i>Carbohydrate (g)</i> | <i>Fat (g)</i> | <i>Weight (g)</i> |
|-------------------------------------------|-----------------|----------------|------------------------|--------------------|-------------------------|----------------|-------------------|
|                                           |                 |                | 4005.08                | 31.6               | 510.32                  | 208.19         | 2551              |
| Breakfast                                 |                 |                | 696.4                  | 3.67               | 157.2                   | 6.12           | 766               |
| Flakes (low-protein flake cereal)         | 52              | Gram           | 192.4                  | 0.16               | 46.8                    | 0.43           | 52                |
| Rice milk, original                       | 200             | Gram           | 100                    | 0.83               | 20                      | 2.08           | 200               |
| Cinnamon raisin swirl bread (low protein) | 2               | Slice          | 240                    | 0.48               | 50                      | 3              | 100               |
| Grapefruit juice                          | 2               | Serving        | 82                     | 1.2                | 19.6                    | 0.2            | 214               |
| Fruit                                     | 2               | Serving        | 82                     | 1                  | 20.8                    | 0.4            | 200               |
| Lunch                                     |                 |                | 455                    | 4                  | 96                      | 7.8            | 600               |
| CBF pizza primavera, low protein          | 152             | Gram           | 265                    | 1.1                | 50                      | 7              | 152               |
| Green beans                               | 1               | Serving        | 26                     | 1.5                | 5.4                     | 0.2            | 104               |
| Fruit                                     | 2               | Serving        | 82                     | 1                  | 20.8                    | 0.4            | 200               |
| Pineapple juice                           | 2               | Serving        | 82                     | 0.4                | 19.8                    | 0.2            | 144               |
| Dinner                                    |                 |                | 1423.49                | 16.03              | 142.89                  | 88.9           | 681               |
| Go pockets, cheesy broccoli (low protein) | 1               | Piece          | 300                    | 2                  | 53                      | 8              | 130               |
| “a” salad, garden salad and drsp pkg      | 1               | Serving        | 30                     | 0.8                | 6.1                     | 0.4            | 100               |
| Nuts, peanuts                             | 28              | Gram           | 163.8                  | 6.63               | 6.02                    | 13.9           | 28                |
| Fruit                                     | 1               | Serving        | 41                     | 0.5                | 10.4                    | 0.2            | 100               |
| Grape juice                               | 2               | Serving        | 82                     | 0.8                | 19.8                    | 0.2            | 132               |

| <i>Item name</i>                          | <i>Quantity</i> | <i>Measure</i> | <i>Calories (kcal)</i> | <i>Protein (g)</i> | <i>Carbohydrate (g)</i> | <i>Fat (g)</i> | <i>Weight (g)</i> |
|-------------------------------------------|-----------------|----------------|------------------------|--------------------|-------------------------|----------------|-------------------|
| Cookie, sandwich, chocolate, Oreo         | 34              | Gram           | 160                    | 1                  | 25                      | 7              | 34                |
| Ice cream, vanilla                        | 115             | Gram           | 268.69                 | 4.3                | 22.57                   | 17.2           | 115               |
| Oil, olive, extra virgin                  | 42              | Gram           | 378                    | 0                  | 0                       | 42             | 42                |
| Evening snack                             |                 |                | 1430.18                | 7.9                | 114.23                  | 105.38         | 504               |
| Homestyle sliced white bread, low protein | 100             | Gram           | 220                    | 0.48               | 48                      | 3              | 100               |
| Lunchmeat, ham                            | 18              | Gram           | 29.34                  | 3.33               | 0.2                     | 1.67           | 18                |
| American cheese singles, low protein      | 38              | Gram           | 120                    | 1.32               | 4                       | 10             | 38                |
| Mayonnaise, regular, Kraft                | 42              | Gram           | 300                    | 0                  | 0                       | 33             | 42                |
| Cookie, creme sugar wafers                | 60              | Gram           | 310.34                 | 0.52               | 41.38                   | 16.55          | 60                |
| Orange juice                              | 2               | Serving        | 82                     | 1.2                | 19.6                    | 0              | 182               |
| Mustard, packet                           | 2               | Serving        | 10                     | 0.6                | 1                       | 0.6            | 14                |
| Butter, salted                            | 50              | Gram           | 358.5                  | 0.45               | 0.05                    | 40.55          | 50                |
| % recommendation                          |                 |                | 119.3                  | 1047.48            | 110.55                  | 199.33         |                   |

The tables show examples of 24-hour meals of one of the volunteers during energy balance and for each overfeeding diet. The four meals consist breakfast (7:00 am), lunch (11:00 am), dinner (16:00 pm), and snack (19:00 pm).

### Changes in Free Thyroxine and Free Triiodothyronine Concentrations During Fasting and Overfeeding Diets via Mixed-Model Analysis

DEPENDENT VARIABLE: Change in Free Thyroxine (ng/dL)

| <i>Diet</i> | <i>Average difference</i> | <i>Standard error</i> | <i>95% confidence interval</i> |                    |
|-------------|---------------------------|-----------------------|--------------------------------|--------------------|
|             |                           |                       | <i>Lower bound</i>             | <i>Upper bound</i> |
| SOF         | 0.005                     | 0.016                 | -0.027                         | 0.037              |
| CNP         | 0.024                     | 0.017                 | -0.009                         | 0.058              |
| EBL         | -0.002                    | 0.016                 | -0.034                         | 0.029              |
| FNP         | -0.025                    | 0.016                 | -0.057                         | 0.007              |
| FST         | <b>0.096*</b>             | 0.016                 | <b>0.064</b>                   | <b>0.128</b>       |
| HPF         | <b>-0.075*</b>            | 0.018                 | <b>-0.110</b>                  | <b>-0.040</b>      |
| LPF         | -0.004                    | 0.016                 | -0.036                         | 0.028              |

Bold values indicate  $p < 0.05$ .

\* $p < 0.05$  versus 0 (no change).

DEPENDENT VARIABLE: Change in Free Triiodothyronine (pg/dL)

| <i>Diet</i> | <i>Average difference</i> | <i>Standard error</i> | <i>95% confidence interval</i> |                    |
|-------------|---------------------------|-----------------------|--------------------------------|--------------------|
|             |                           |                       | <i>Lower bound</i>             | <i>Upper bound</i> |
| SOF         | -0.074                    | 0.048                 | -0.169                         | 0.020              |
| CNP         | -0.023                    | 0.048                 | -0.117                         | 0.071              |
| EBL         | -0.074                    | 0.047                 | -0.166                         | 0.018              |
| FNP         | 0.021                     | 0.048                 | -0.072                         | 0.115              |
| FST         | <b>-0.171*</b>            | <b>0.048</b>          | <b>-0.265</b>                  | <b>-0.077</b>      |
| HPF         | <b>-0.125*</b>            | <b>0.052</b>          | <b>-0.227</b>                  | <b>-0.024</b>      |
| LPF         | <b>0.136*</b>             | <b>0.048</b>          | <b>0.043</b>                   | <b>0.230</b>       |

Bold values indicate  $p < 0.05$ .

\* $p < 0.05$  versus 0 (no change).

CNP, high-carbohydrate normal-protein with 75% carbohydrate, 5% fat, and 20% protein; EBL, energy balance diet with 50% carbohydrate, 30% fat, and 20% protein; FNP, high-fat normal-protein with 60% fat, 20% carbohydrate, and 20% protein; FST, 24-hour fasting; HPF, high-protein high-fat overfeeding with 26% carbohydrate, 44% fat, and 30% protein; LPF, low-protein high-fat overfeeding with 51% carbohydrate, 46% fat, and 3% protein; SOF, standard overfeeding with 50% carbohydrate, 30% fat, and 20% protein.
