# Supplementary material
Source: PubMed Central journal article supplement (PMC6864752)
Supplement: Supp_Table1.pdf [file Supp_Table1.pdf]

SUPPLEMENTARY TABLE S1. RELATIONSHIP BETWEEN CHANGES IN THYROID HORMONES CONCENTRATIONS AND CHANGES IN 24-HOUR ENERGY EXPENDITURE AND 24-HOUR RESPIRATORY QUOTIENT DURING DIETARY INTERVENTIONS

|                                 | <i>FST</i>           | <i>HPF</i>           | <i>LPF</i>            |
|---------------------------------|----------------------|----------------------|-----------------------|
| Change in fT4 (ng/dL) versus    |                      |                      |                       |
| Change in 24-hour EE (kcal/day) | $r=-0.06$<br>$p=0.6$ | $r=-0.19$<br>$p=0.2$ | $r=0.07$<br>$p=0.6$   |
| Change in 24-hour EE (%)        | $r=-0.05$<br>$p=0.7$ | $r=-0.15$<br>$p=0.3$ | $r=0.05$<br>$p=0.7$   |
| Change in 24-hour RQ (ratio)    | $r=0.24$<br>$p=0.07$ | $r=-0.21$<br>$p=0.2$ | $r=0.08$<br>$p=0.7$   |
| Change in fT3 (pg/mL) versus    |                      |                      |                       |
| Change in 24-hour EE (kcal/day) | $r=-0.04$<br>$p=0.8$ | $r=-0.06$<br>$p=0.7$ | $r=-0.08$<br>$p=0.5$  |
| Change in 24-hour EE (%)        | $r=-0.05$<br>$p=0.7$ | $r=-0.02$<br>$p=0.8$ | $r=-0.1$<br>$p=0.4$   |
| Change in 24-hour RQ (ratio)    | $r=-0.05$<br>$p=0.7$ | $r=-0.17$<br>$p=0.2$ | $r=-0.003$<br>$p=0.9$ |

The table shows the strength of relationship between the changes in plasma fT4 and fT3 concentrations and the change in 24-hour EE (expressed as absolute value and as percentage of 24-hour EE during energy balance) and the change in 24-hour RQ. The absolute change in 24-hour EE is referring to the difference between the 24-hour EE during each diet and the 24-hour EE during energy balance. Similarly, the change in 24-hour RQ is referring to the absolute difference between the 24-hour RQ during each diet and the 24-hour RQ during energy balance. Associations were quantified by the Pearson correlation index.

EE, energy expenditure; FST, 24-hour fasting; fT3, free triiodothyronine; fT4, free thyroxine; HPF, high-protein overfeeding with 26% carbohydrate, 44% fat, and 30% protein; LPF, low-protein overfeeding with 51% carbohydrate, 46% fat, and 3% protein; RQ, respiratory quotient.
