# Supplementary material
Source: PubMed Central journal article supplement (PMC6864752)

## Supplementary Data

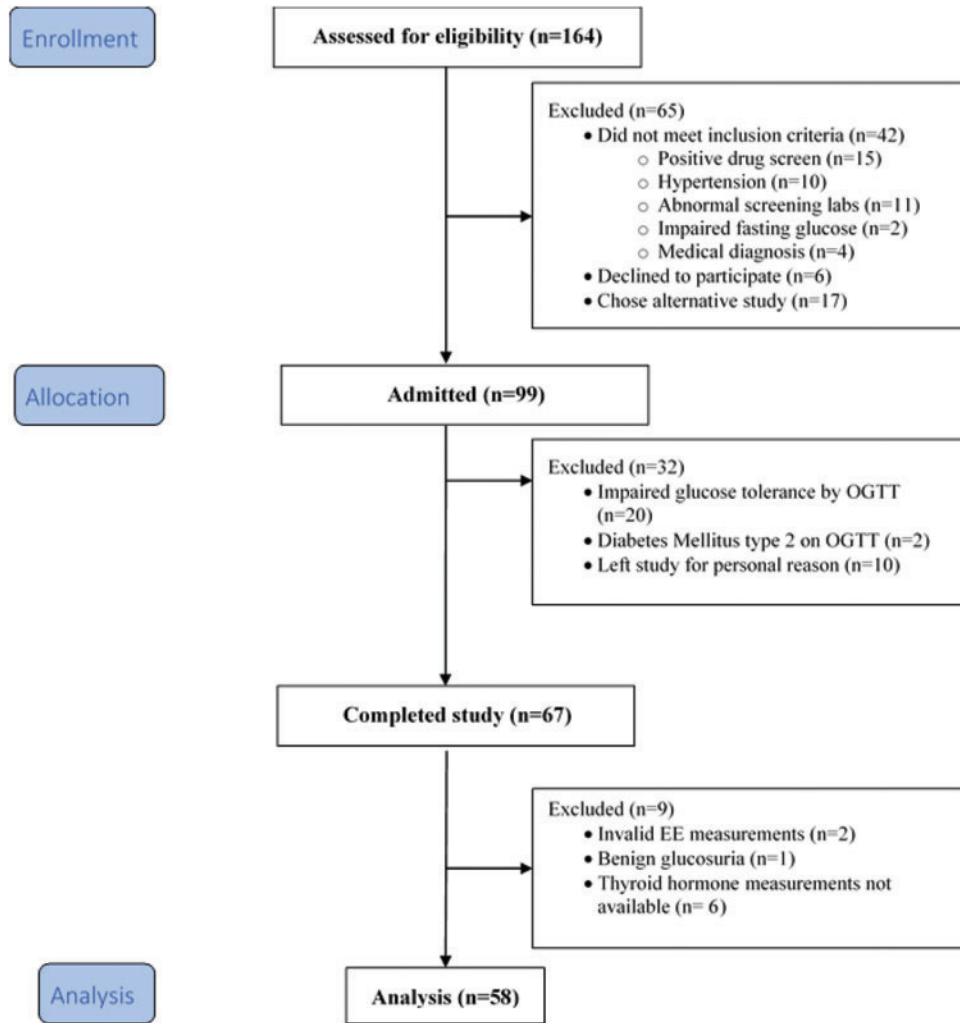

**SUPPLEMENTARY FIG. S1.** Consort flowchart. OGTT, oral glucose tolerance test.

Supplement: Supp_Fig1.pdf [file Supp_Fig1.pdf]
